# Supplementary material
Source: HighWire-hosted journal article supplement (https://bmjophth.bmj.com/content/7/1/e000911)
Supplement: inline-supplementary-material-1 [file inline-supplementary-material-1.xls]

## Sheet: 17-3-2020 - Copy
name	weight	gestationalage	ageatpresentation	retinalanatomy	reinoscopy	placeofbirth	gender	anatomicalchanges	weightcatagory	lateorearlypresentation	openorclosedfunnel	sector	referral	neonatologistreferral	within4months	told_or_not	large_or_Big_city	Far_or_near
	0.8	27	6	3	1	11	2	1	1	1	2	1	3	2	2	2	1	1
	1.2	26	5	3	1	10	1	1	1	1	2	1	3	2	2	2	2	1
	1.1	28	1.5	1	1	1	1	1	1	1	1	1	3	2	1	1	3	1
	0.9	27	1.5	1	1	1	1	1	1	1	1	1	3	2	2	1	3	1
	1.1	28	2	1	1	1	1	1	1	1	1	2	1	1	1	1	3	1
	1.4	28	2	1	1	1	2	1	2	1	1	1	3	2	1	1	3	1
	1	30	3	1	1	1	2	1	1	1	1	1	3	2	1	2	3	1
	0.9	28	3	1	1	1	2	1	1	1	1	1	3	2	1	2	3	1
	0.8	28	4	1	1	1	2	1	1	1	1	2	2	2	1	1	3	1
	1.4	28	5	1	1	1	2	1	2	1	1	2	3	2	2	2	3	1
	1.3	27	6	1	1	1	2	1	1	1	1	1	2	2	2	2	3	1
	1.9	28	6	1	1	1	1	1	2	1	1	2	3	2	2	2	3	1
	1.2	30	7	1	1	1	1	1	1	1	1	1	3	2	2	2	3	1
	1.3	32	7	3	1	1	1	1	1	1	2	1	3	2	2	2	3	1
	1.3	27	8	1	1	1	2	1	1	2	1	1	3	2	2	2	3	1
	0.9	28	9	3	1	1	2	1	1	1	2	1	2	2	2	2	3	1
	0.9	28	14	1	1	1	2	1	1	2	1	1	3	2	2	2	3	1
	1	28	14	3	1	1	2	1	1	1	2	1	3	2	2	2	3	1
	2.1	38	15	1	1	1	2	1	2	2	1	2	2	2	2	2	3	1
	1	30	24	3	3	1	1	1	1	1	2	1	3	2	2	2	3	1
	1.8	31	3	2	3	1	1	2	2	1	#NULL!	1	2	2	1	2	3	1
	1.5	28	6	4	-5	1	2	2	2	1	#NULL!	1	2	2	2	2	3	1
	1.6	28	8	2	-3	1	2	2	2	2	#NULL!	1	3	2	2	2	3	1
	1.6	28	8	4	-5	1	1	2	2	2	#NULL!	1	3	2	2	2	3	1
	1.4	30	24	2	-4	1	1	2	2	2	#NULL!	1	2	2	2	2	3	1
	1.1	31	24	2	-4	1	2	2	1	2	#NULL!	1	2	2	2	2	3	1
	1	28	30	2	-4	1	2	2	1	2	#NULL!	1	2	2	2	2	3	1
	1.6	28	1.5	1	1	1	2	1	2	1	1	1	1	1	1	1	3	1
	1.2	28	2	1	1	2	1	1	1	1	1	1	2	2	1	2	1	2
	1.2	28	4	1	1	2	1	1	1	1	1	2	1	1	1	2	1	2
	1	32	7	1	1	3	1	1	1	1	1	1	3	2	2	2	1	2
	1.5	28	9	3	1	2	2	1	2	1	2	1	3	2	2	2	1	2
	1.3	28	10	1	1	3	1	1	1	2	1	1	3	2	2	2	1	2
	1	26	12	3	1	11	2	1	1	1	2	2	3	2	2	2	1	2
	1.9	30	12	2	-6	11	1	2	2	2	#NULL!	1	2	2	2	2	1	2
	0.9	27	36	1	1	12	1	1	1	2	1	1	3	2	2	2	2	2
	1	28	8	1	1	1	1	1	1	2	1	1	3	2	2	2	3	2
	1	28	2	1	1	4	2	1	1	1	1	2	1	1	1	1	1	3
	1.2	28	3	1	1	4	2	1	1	1	1	1	1	1	1	2	1	3
	0.9	29	6	3	1	8	1	1	1	1	2	1	2	2	2	2	1	3
	1.8	35	8	1	1	4	1	1	2	2	1	1	3	2	2	2	1	3
	2	28	12	2	-2	4	1	2	2	2	#NULL!	2	2	2	2	2	1	3
	0.9	27	24	2	-2	4	2	2	1	2	#NULL!	1	2	2	2	2	1	3
	1.2	33	30	2	-3	4	1	2	1	2	#NULL!	2	2	2	2	2	1	3
	1.5	32	7	1	1	6	1	1	2	1	1	1	3	2	2	2	2	3
	0.9	26	9	3	1	9	1	1	1	1	2	1	3	2	2	2	2	3
	0.9	29	12	1	1	9	2	1	2	2	1	1	3	2	2	2	2	3
	1.2	29	5	1	1	5	2	1	1	1	1	1	2	2	2	2	3	3
	1	28	8	3	1	9	2	1	1	1	2	1	2	2	2	2	3	3
	0.9	30	8	3	1	5	2	1	1	1	2	1	2	2	2	2	3	3
	1.2	28	12	4	3	5	1	2	1	2	#NULL!	2	3	2	2	2	3	3
